# Supplementary material for: Discovery of a Novel Inner Membrane-Associated Bacterial Structure Related to the Flagellar Type III Secretion System
Source: PubMed Central journal article supplement (PMC9380563; doi:10.1128/jb.00144-22), 2022-07-18
Supplement: jb.00144-22-s0001.pdf [file jb.00144-22-s0001.pdf]

1 **Supporting Figures for:**

2 **Discovery of a novel inner-membrane-associated bacterial structure related to**  
3 **the flagellar type III secretion system**

4  
5 Mohammed Kaplan<sup>1</sup>, Catherine M. Oikonomou<sup>1</sup>, Cecily R. Wood<sup>2</sup>, Georges Chreifi<sup>1</sup>, Debnath  
6 Ghosal<sup>3</sup>, Megan J. Dobro<sup>4</sup>, Qing Yao<sup>1</sup>, Ritesh Ranjan Pal<sup>5,6</sup>, Amit K. Baidya<sup>7</sup>, Yuxi Liu<sup>1</sup>, Stefano  
7 Maggi<sup>1</sup>, Alasdair W. McDowall<sup>1</sup>, Sigal Ben-Yehuda<sup>5</sup>, Ilan Rosenshine<sup>5</sup>, Ariane Briegel<sup>8</sup>, Morgan  
8 Beeby<sup>9</sup>, Yi-Wei Chang<sup>10</sup>, Carrie L. Shaffer<sup>2,11,12</sup>, Grant J. Jensen<sup>1,13,\*</sup>

9  
10 **Affiliations**

11 <sup>1</sup>Division of Biology and Biological Engineering, California Institute of Technology, Pasadena, CA 91125, USA

12 <sup>2</sup>University of Kentucky Department of Veterinary Science

13 <sup>3</sup>Division of Medicine, Dentistry and Health Sciences, University of Melbourne, Parkville, Victoria, Australia

14 <sup>4</sup>Hampshire College, Amherst, Massachusetts, USA

15 <sup>5</sup>Department of Microbiology and Molecular Genetics, Institute of Medical Research Israel-Canada, Faculty of  
16 Medicine, The Hebrew University of Jerusalem 91120, Jerusalem, Israel

17 <sup>6</sup> School of Biological Sciences, Indian Association for the Cultivation of Science, Kolkata, India

18 <sup>7</sup>Molecular Biophysics Unit, Indian Institute of Science, Bangalore 56001, Karnataka, India

19 <sup>8</sup>Leiden University, Sylvius Laboratories, Leiden, The Netherlands

20 <sup>9</sup>Department of Life Sciences, Imperial College London, South Kensington Campus, London SW7 2AZ, UK

21 <sup>10</sup>Department of Biochemistry and Biophysics, Perelman School of Medicine, University of Pennsylvania,  
22 Philadelphia, PA 19104, USA

23 <sup>11</sup>University of Kentucky Department of Microbiology, Immunology, and Molecular Genetics

24 <sup>12</sup>University of Kentucky Department of Pharmaceutical Sciences

25 <sup>13</sup>Department of Chemistry and Biochemistry, Brigham Young University, Provo, UT 84604, USA

26 \*Corresponding author: grant\_jensen@byu.edu

27

*S. enterica*

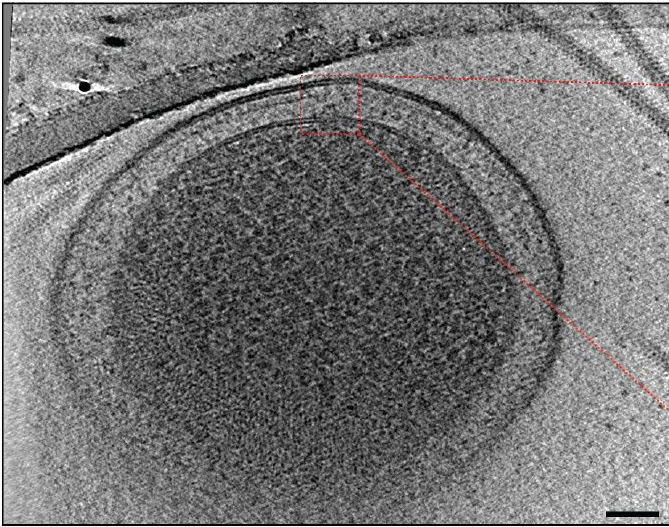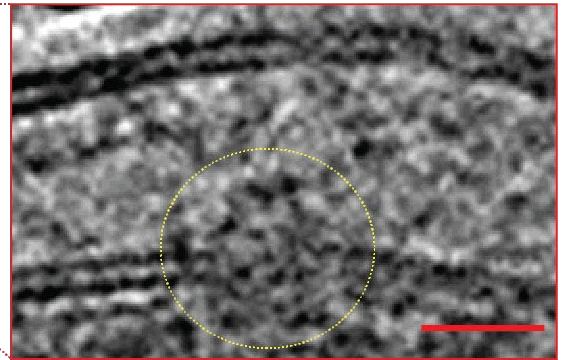

*E. coli*

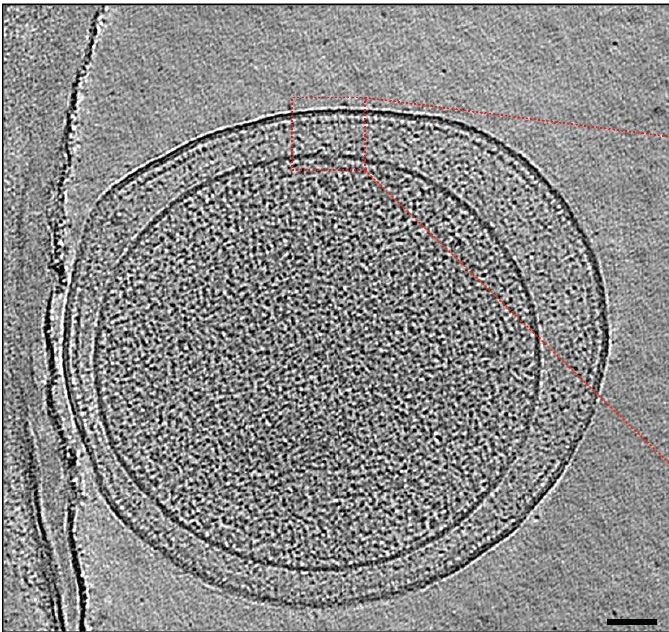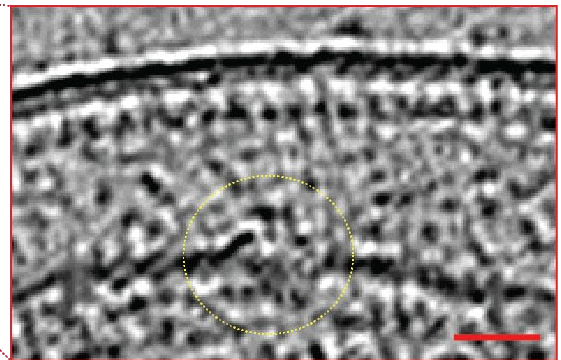

28

29

30

31

*V. cholerae*

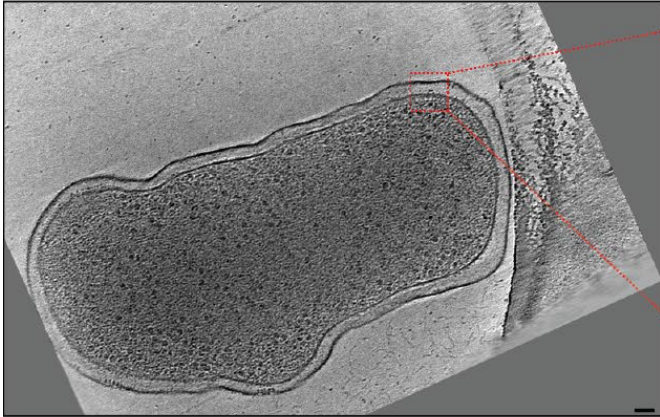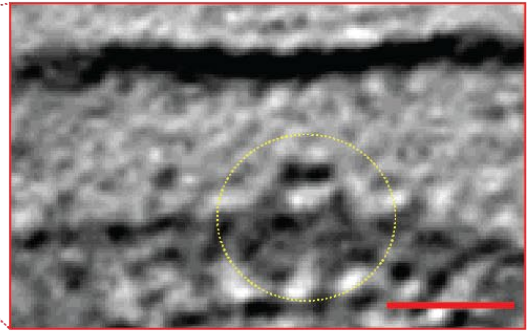

*V. fischeri*

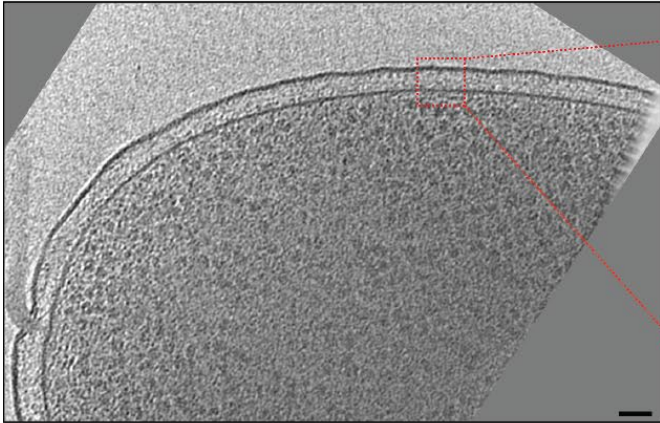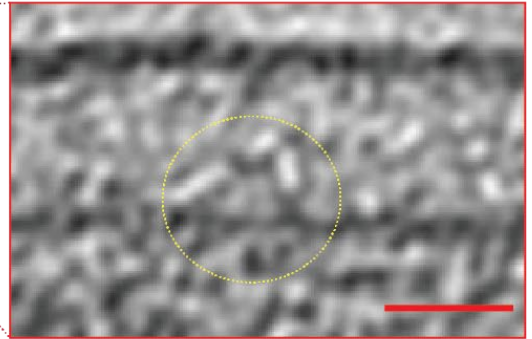

*V. harveyi*

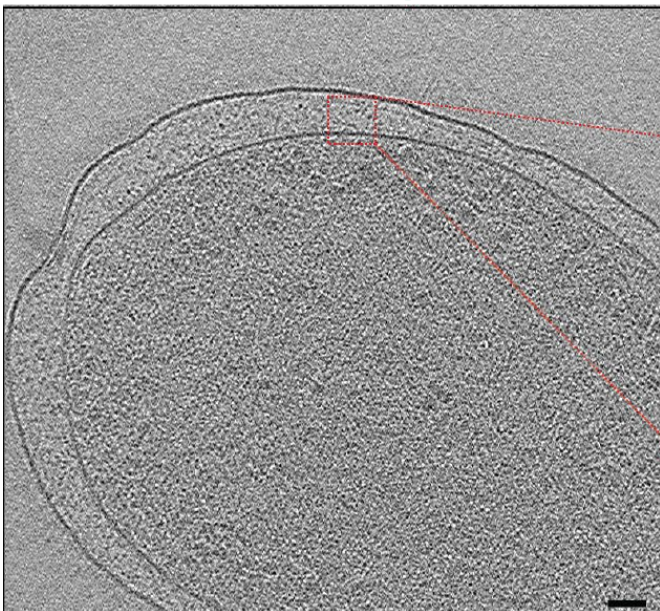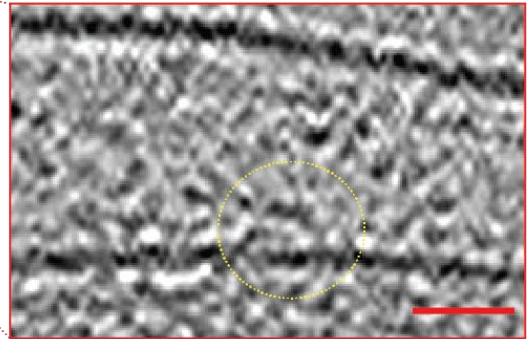

*P. aeruginosa*

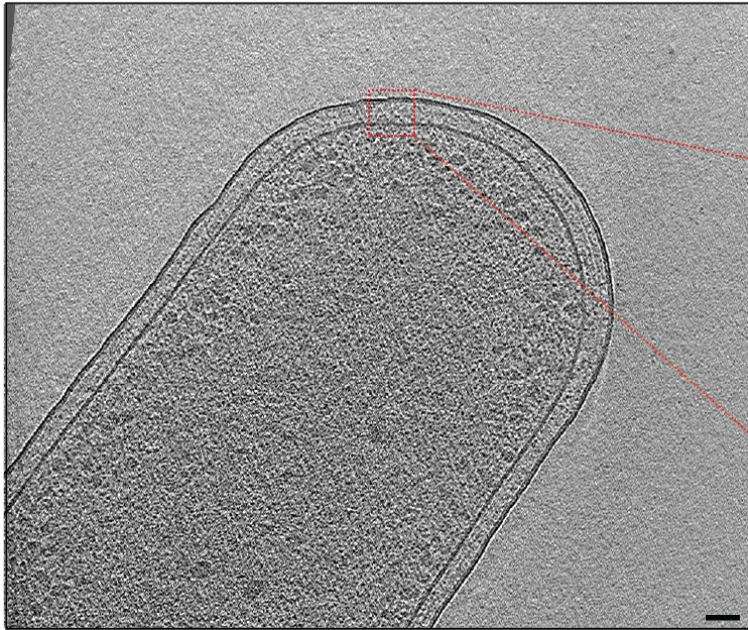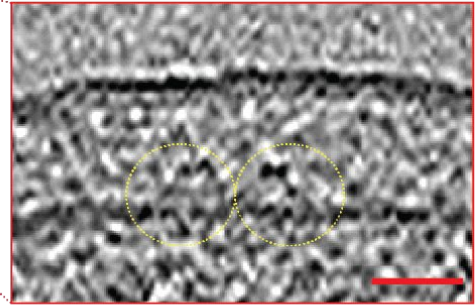

*L. pneumophila*

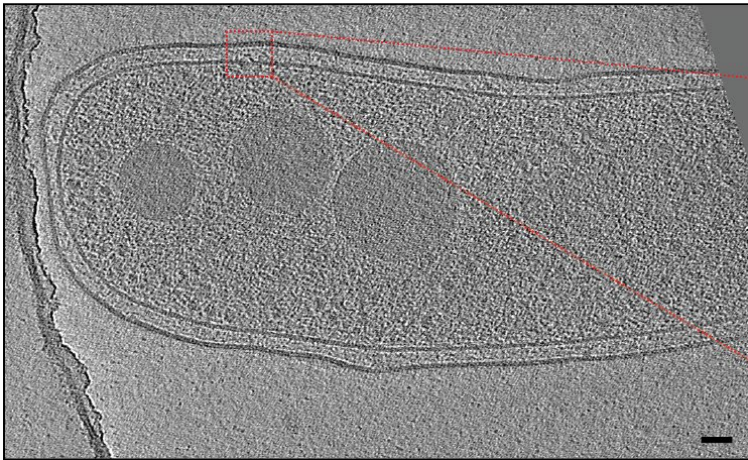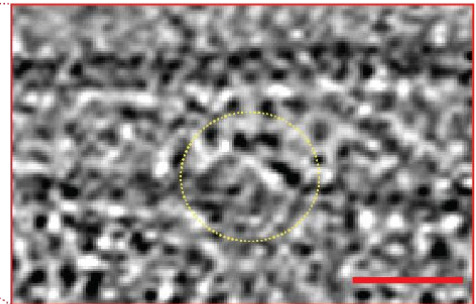

33

34

35

36

37

38

*X. citri*

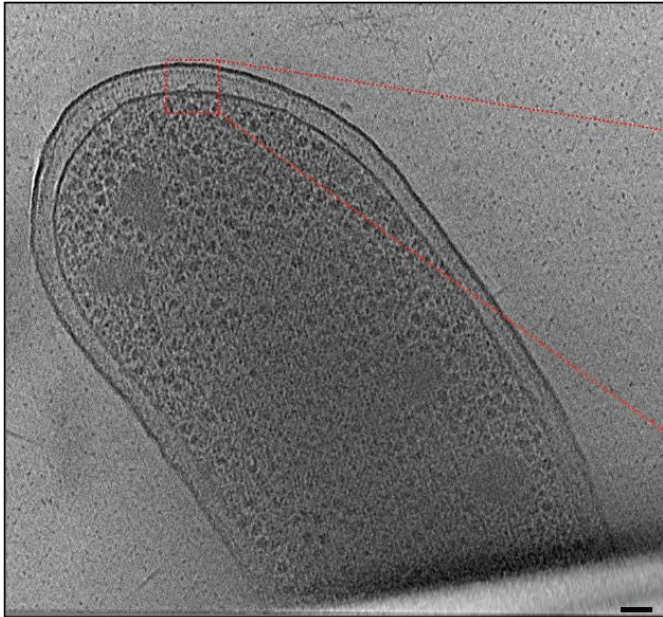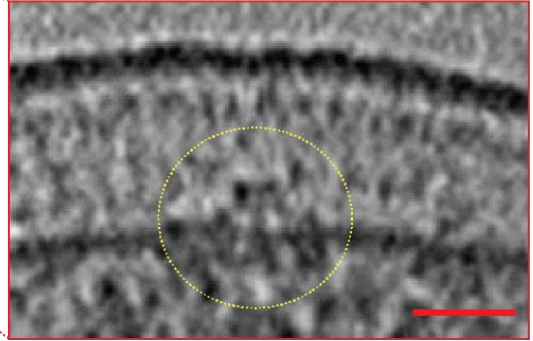

*P. luteoviolacea*

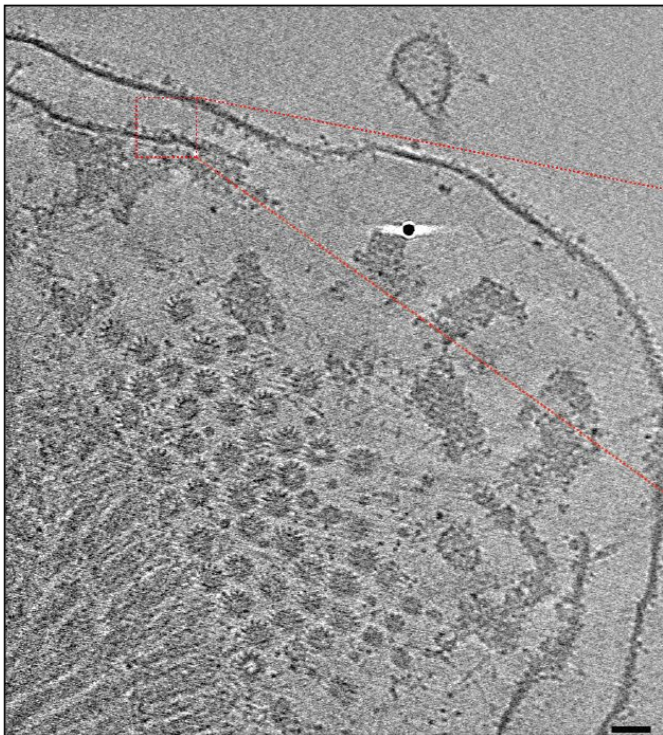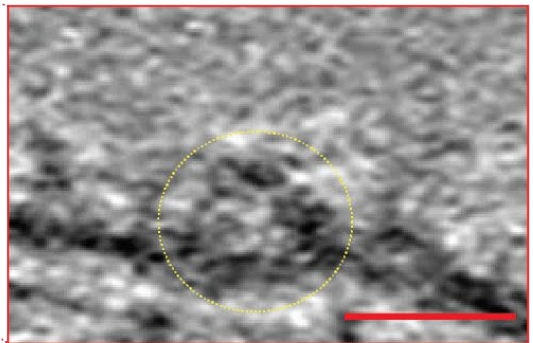

39

40

41

*P. flexibilis*

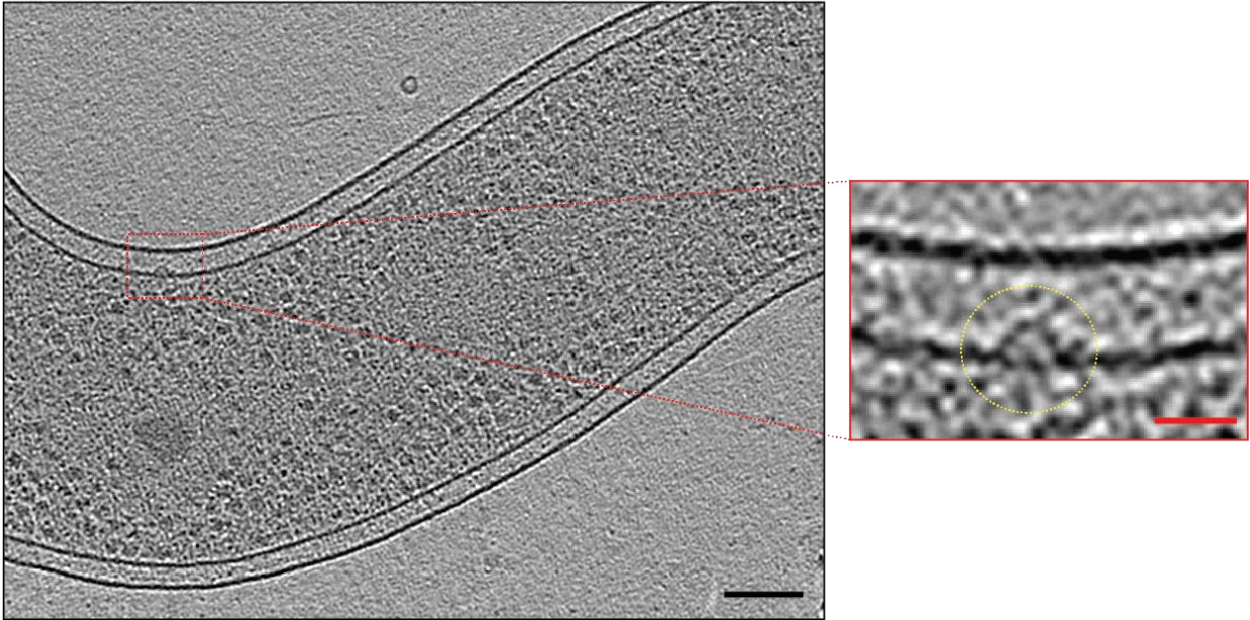

*P. mirabilis*

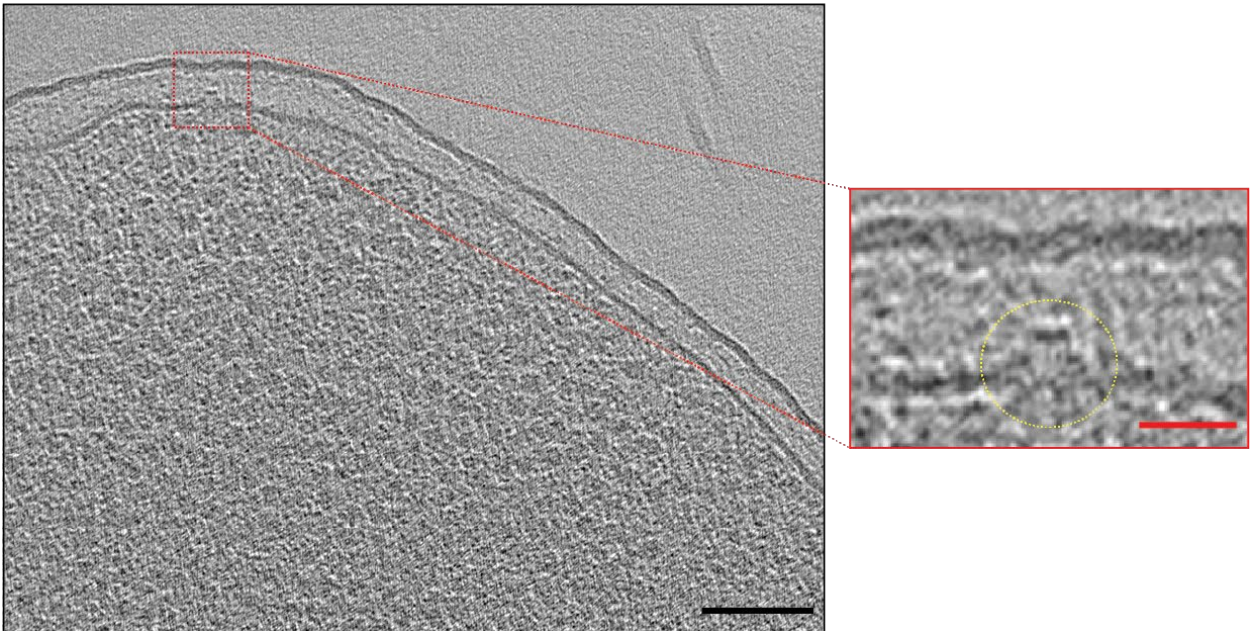

42

43

44

45

*A. brasilense*

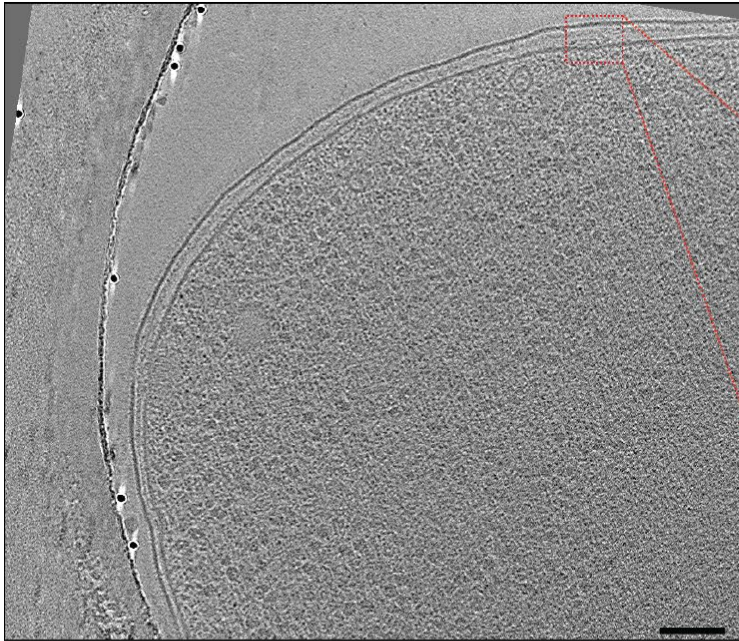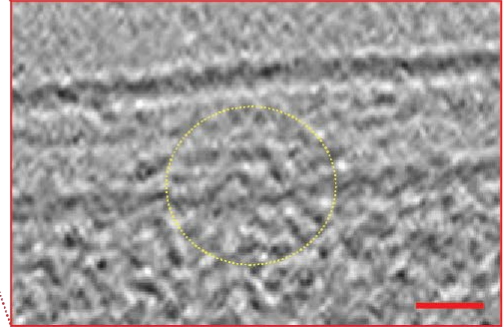

*B. abortus*

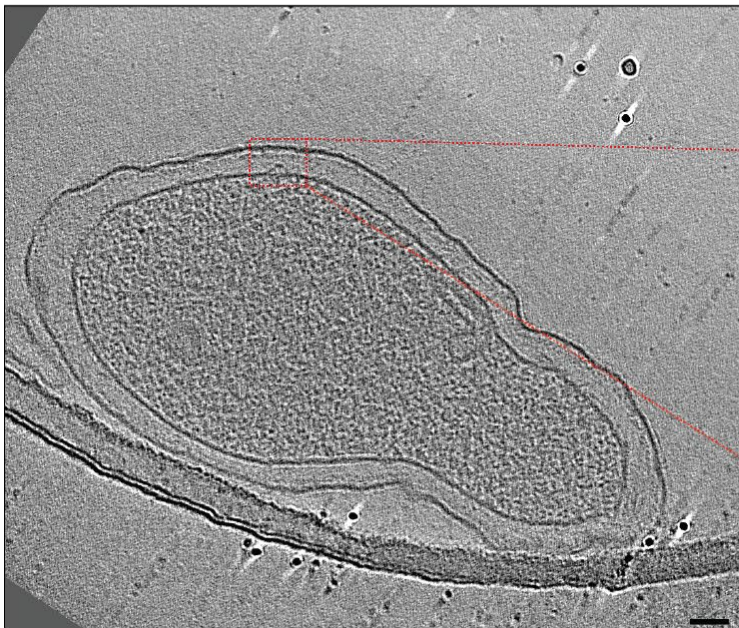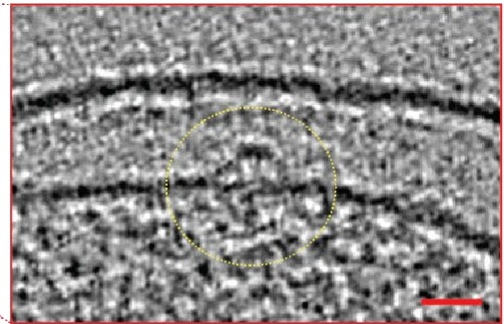

46

47

48

49

*A. tumefaciens*

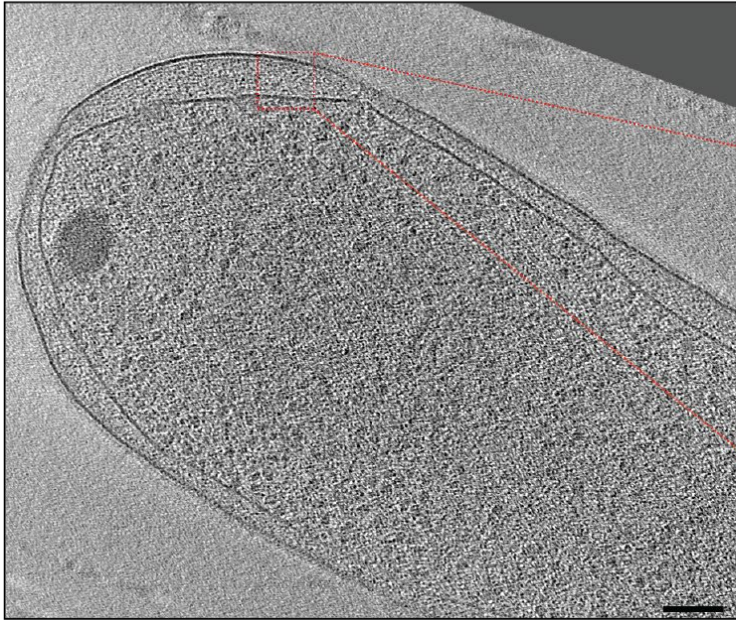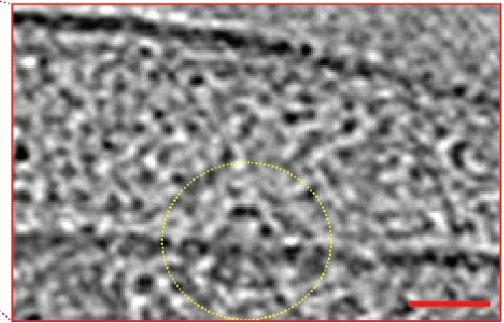

*H. neptunium*

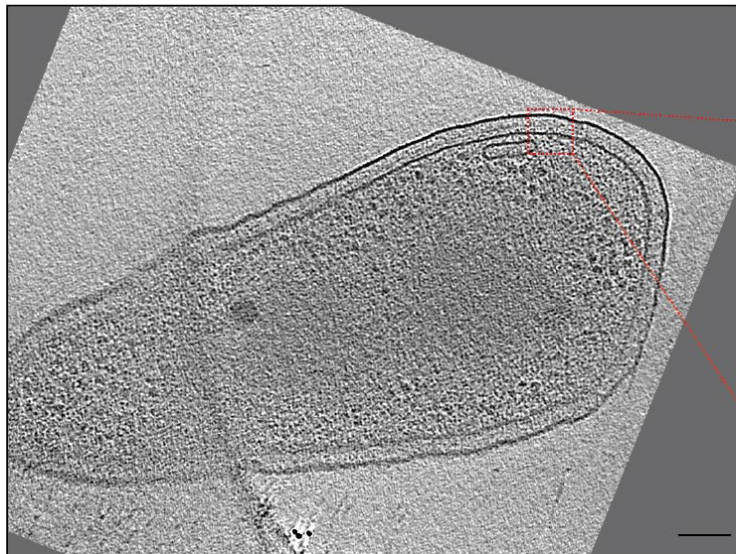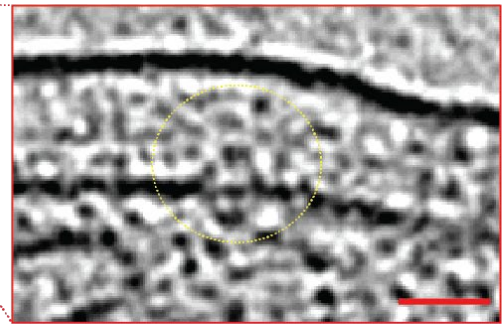

50

51

52

53

54



*C.jejuni*  $\Delta flhAc$

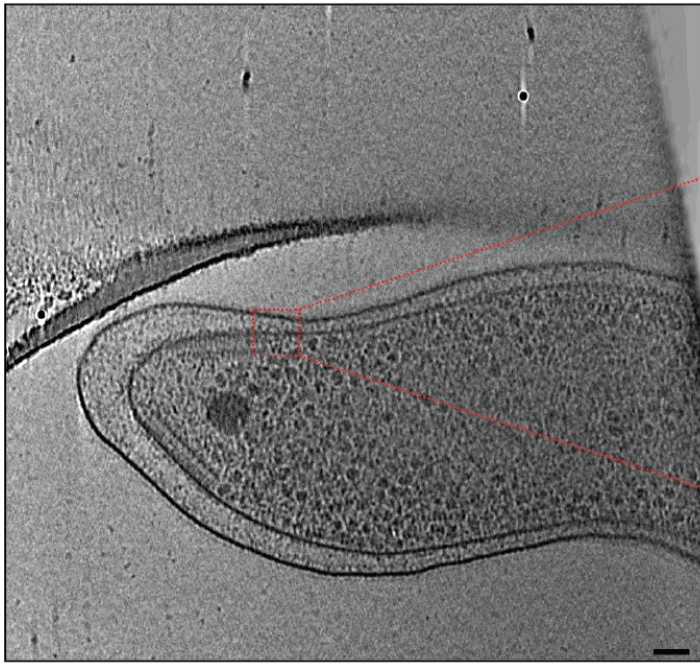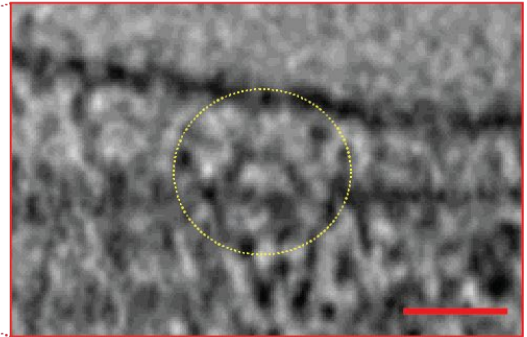

*C.jejuni*  $\Delta flhBc$

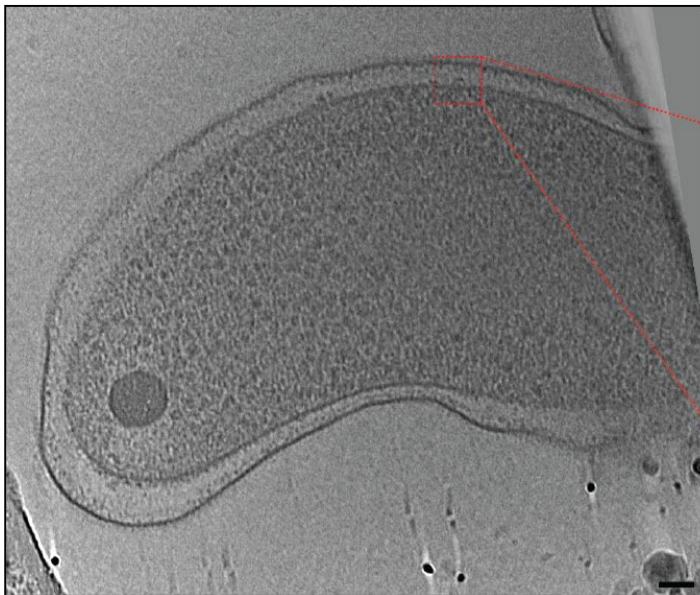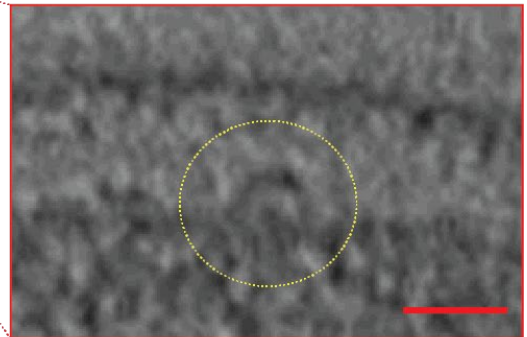

55

56

57

58

lysed *B. subtilis*

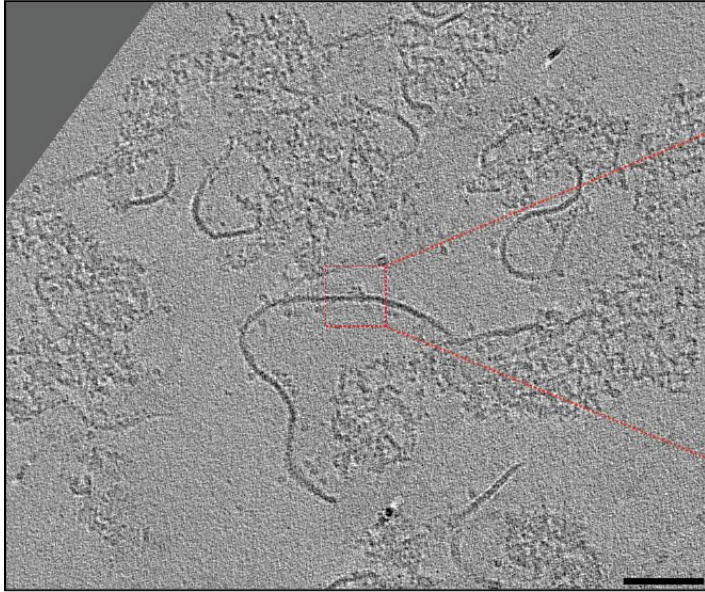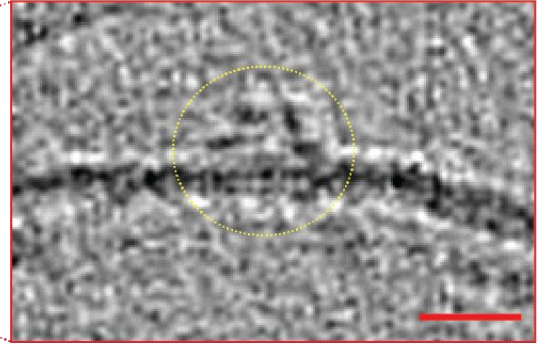

*H. gracilis*

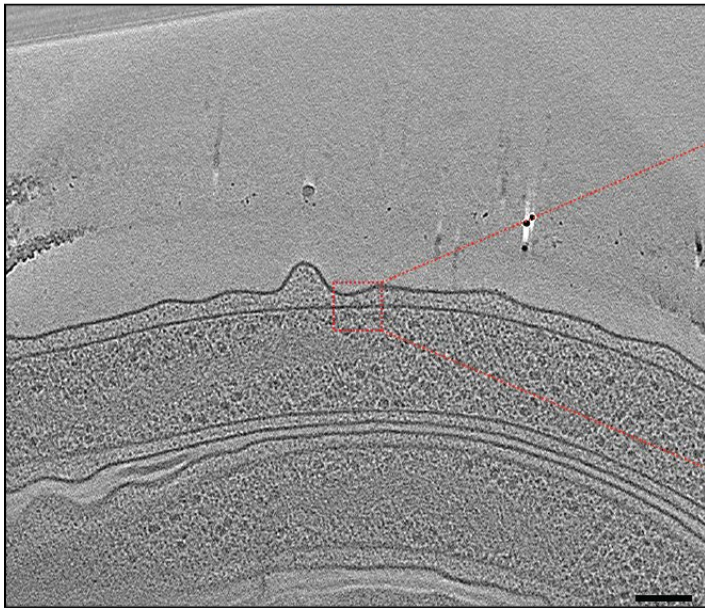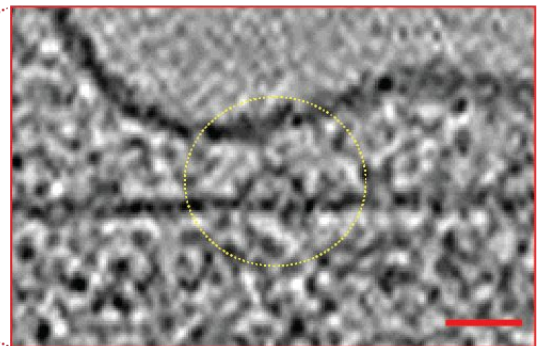

59

60

61

62

63 **Figure S1: The hat-like structure is widespread in various bacterial species.** Slices through  
64 electron cryo-tomograms of various bacterial species highlighting the presence of hat-like  
65 complexes (yellow circles in the enlarged views). Black scale bars 100 nm, red scale bars 20 nm.

66

67

68

69

70

71

72

73

74

75

76

77

78

79

80

81

82

83

84

85

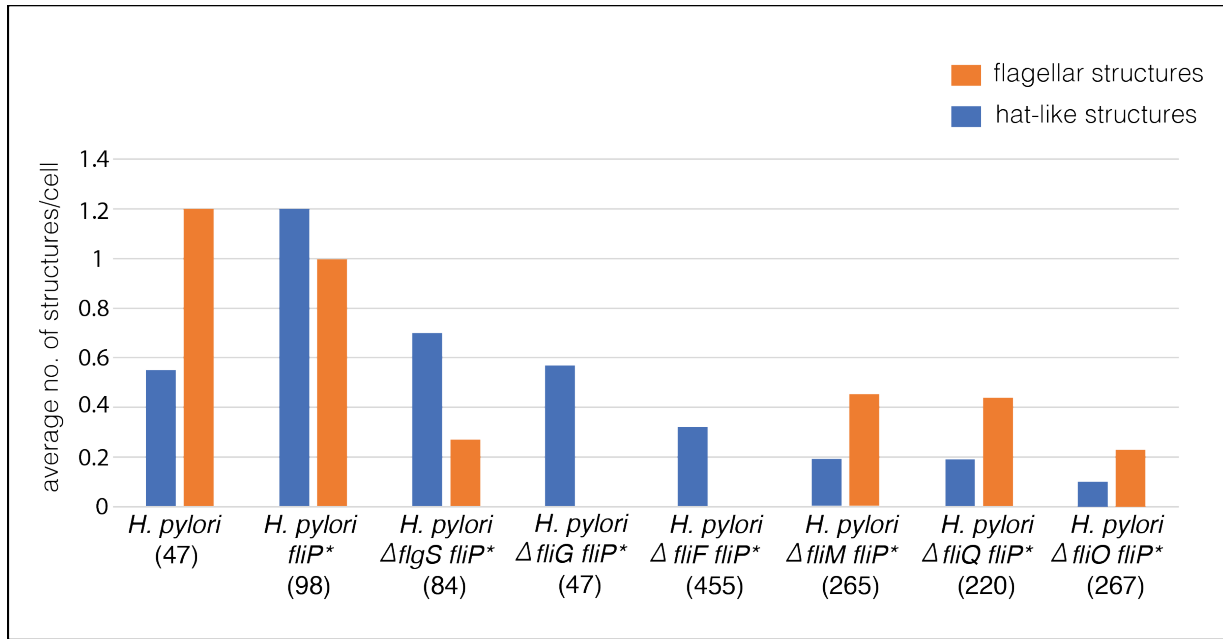

86

87 **Figure S2: Abundance of hat-like and flagellar structures in motile *H. pylori* cells and various**

88 **mutants.** The bar chart shows the average number of hat-like structures and flagellar structures

89 per cell in motile *H. pylori* and various mutants. The number of cells examined for each strain is

90 indicated in parentheses. Flagellar structures include fully-assembled flagella and any intermediate

91 assembly stage where the MS-ring is present. In two mutants ( $\Delta fliG fliP^*$  and  $\Delta fliF fliP^*$ ), only

92 hat-like structures were identified but no flagellar structures.

93

94

95

96

97

98

99

100

*Myxococcus xanthus*

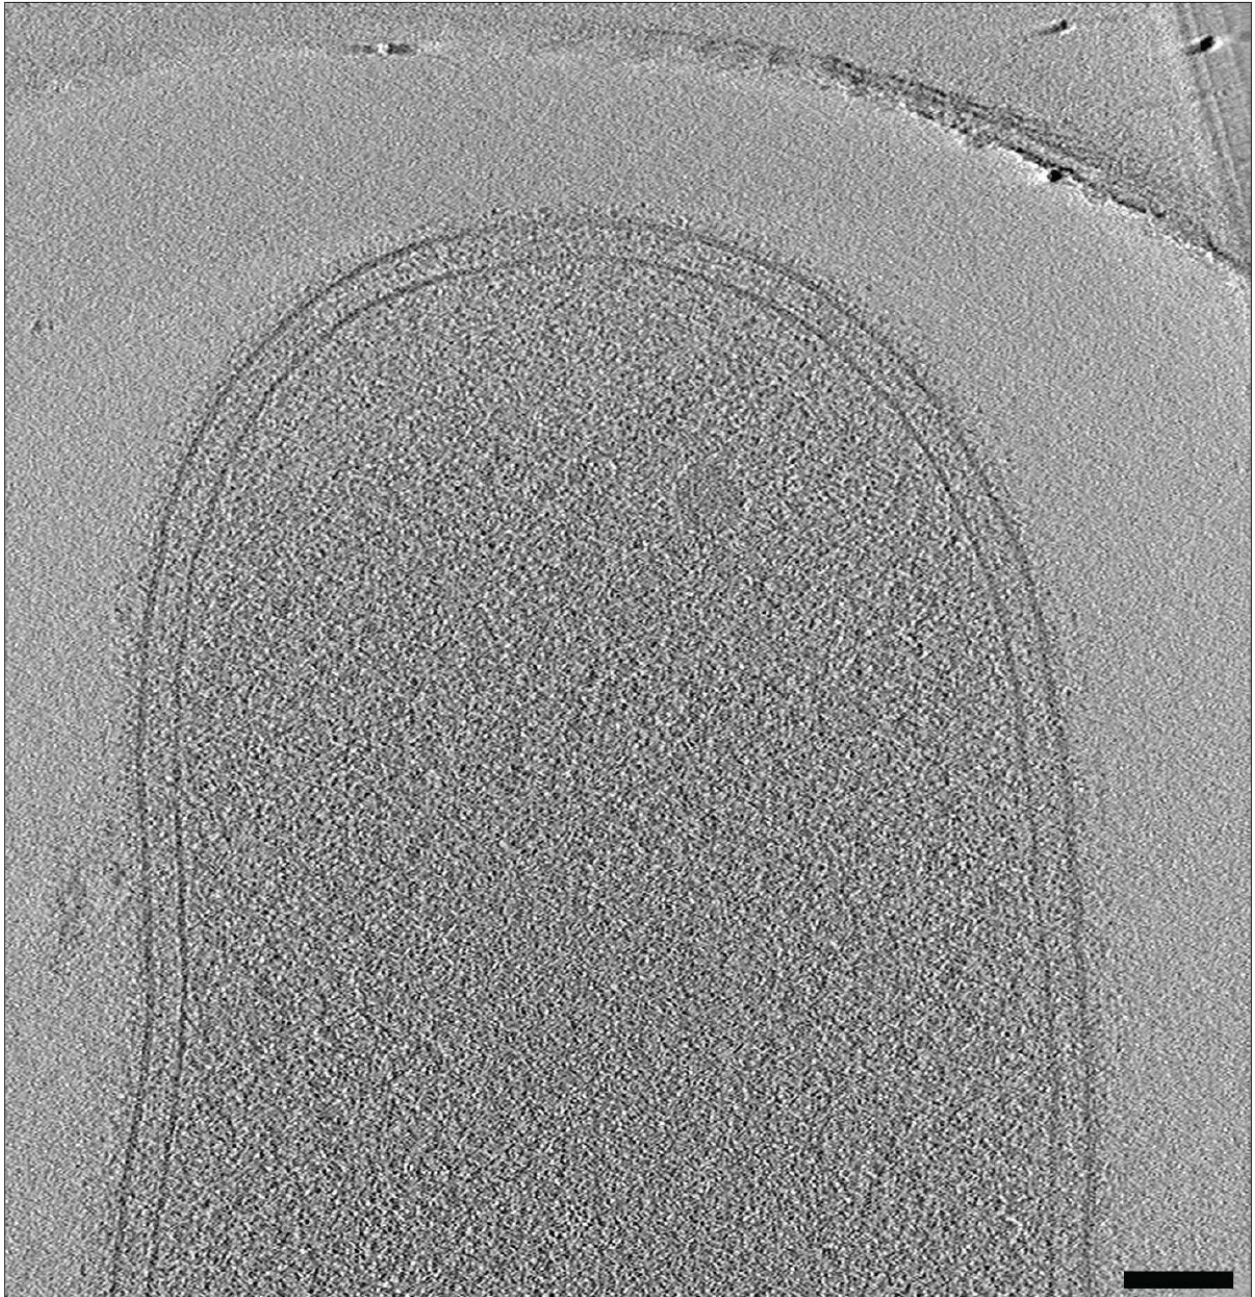

101

102

103

104

105

106

*Prosthecobacter vanneervanii*

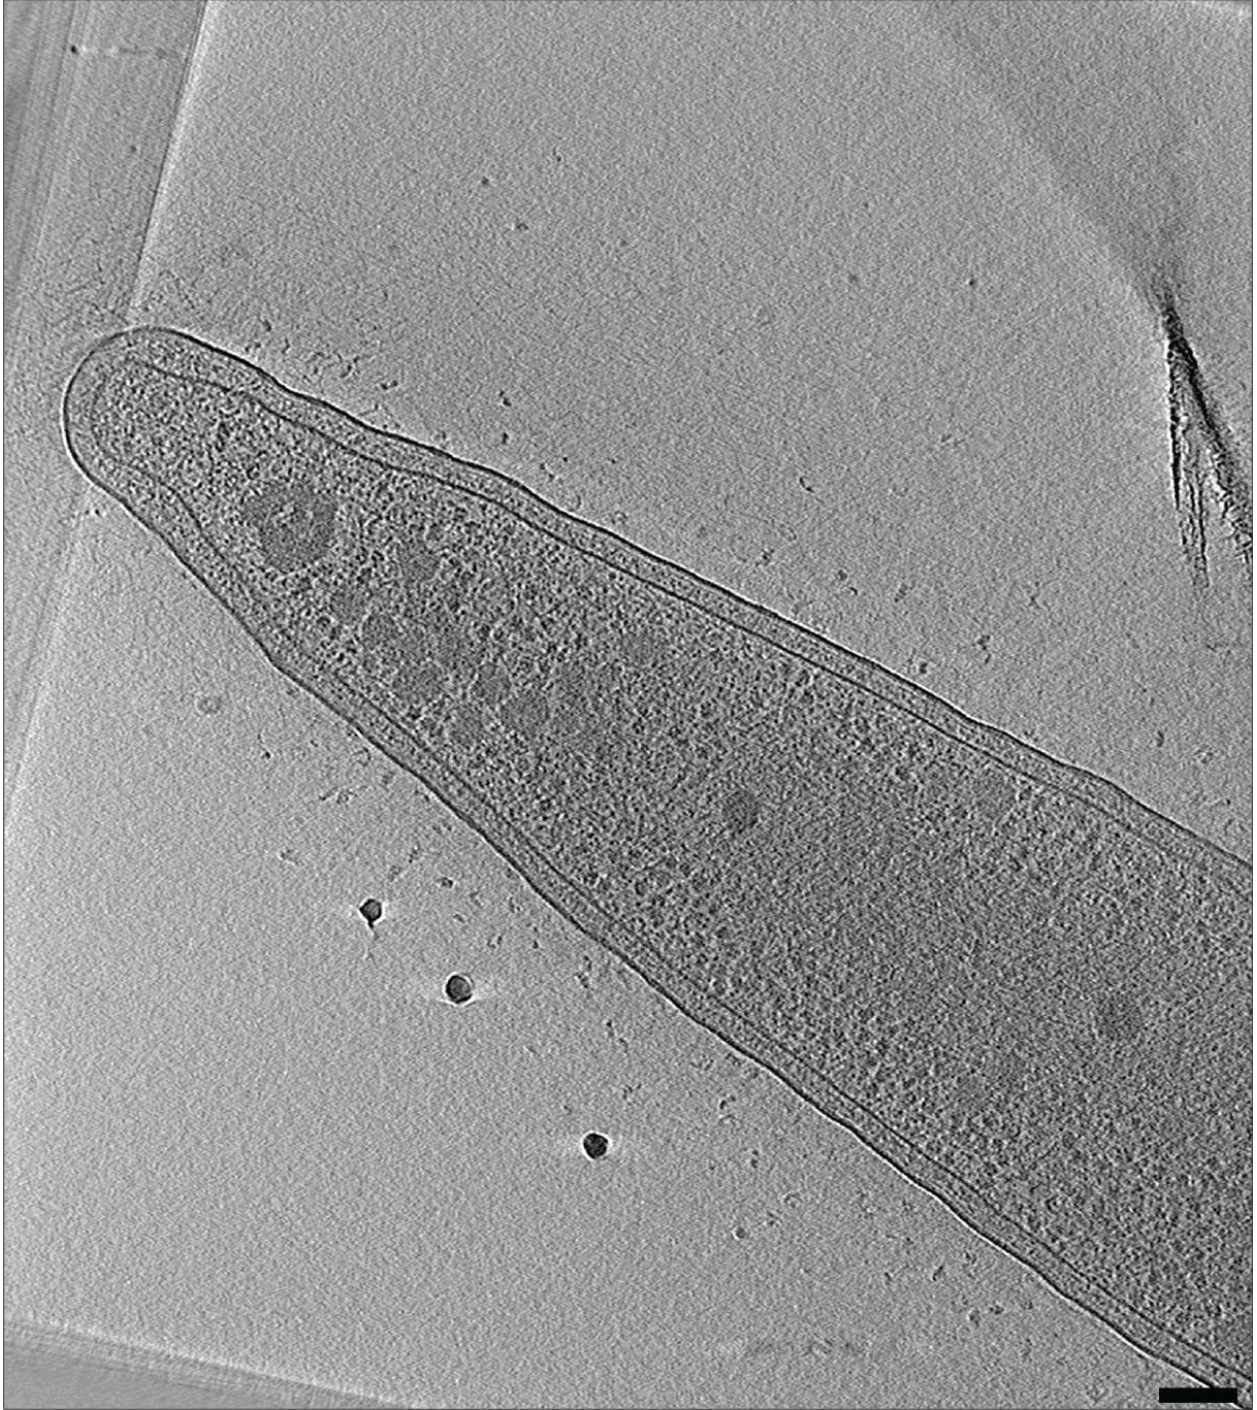

107  
108  
109  
110  
111  
112

Enteropathogenic  
*Escherichia coli* (EPEC)

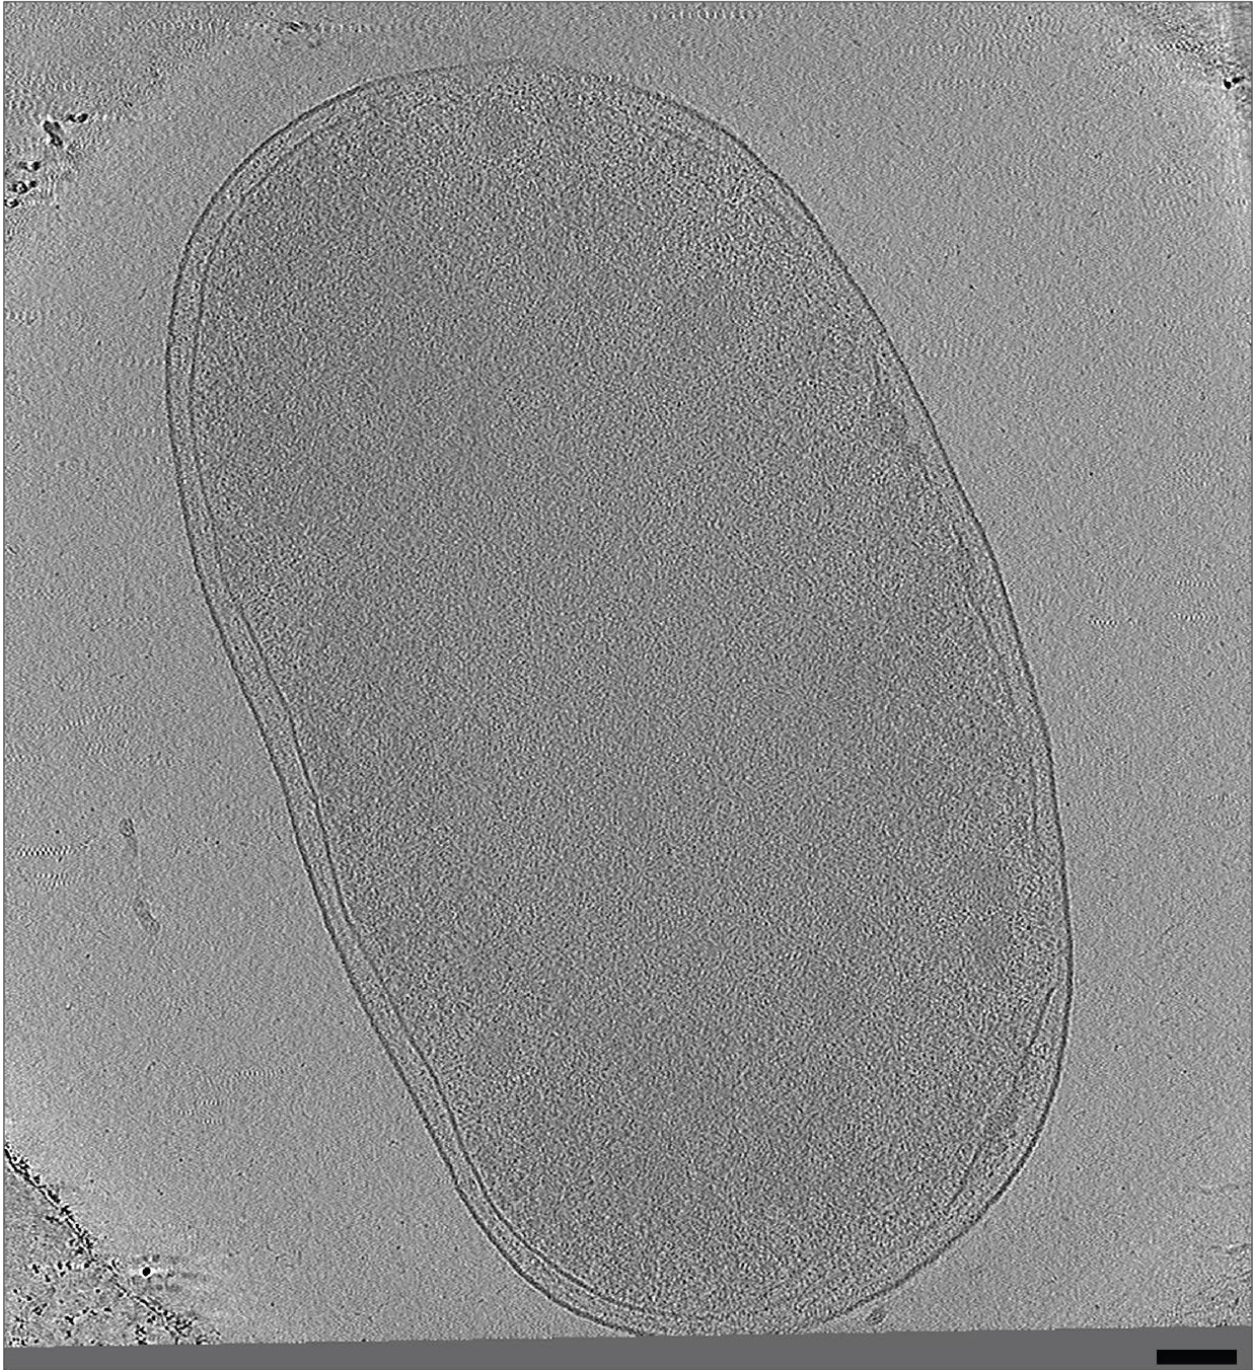

113

114

115

*Flavobacterium johnsoniae*

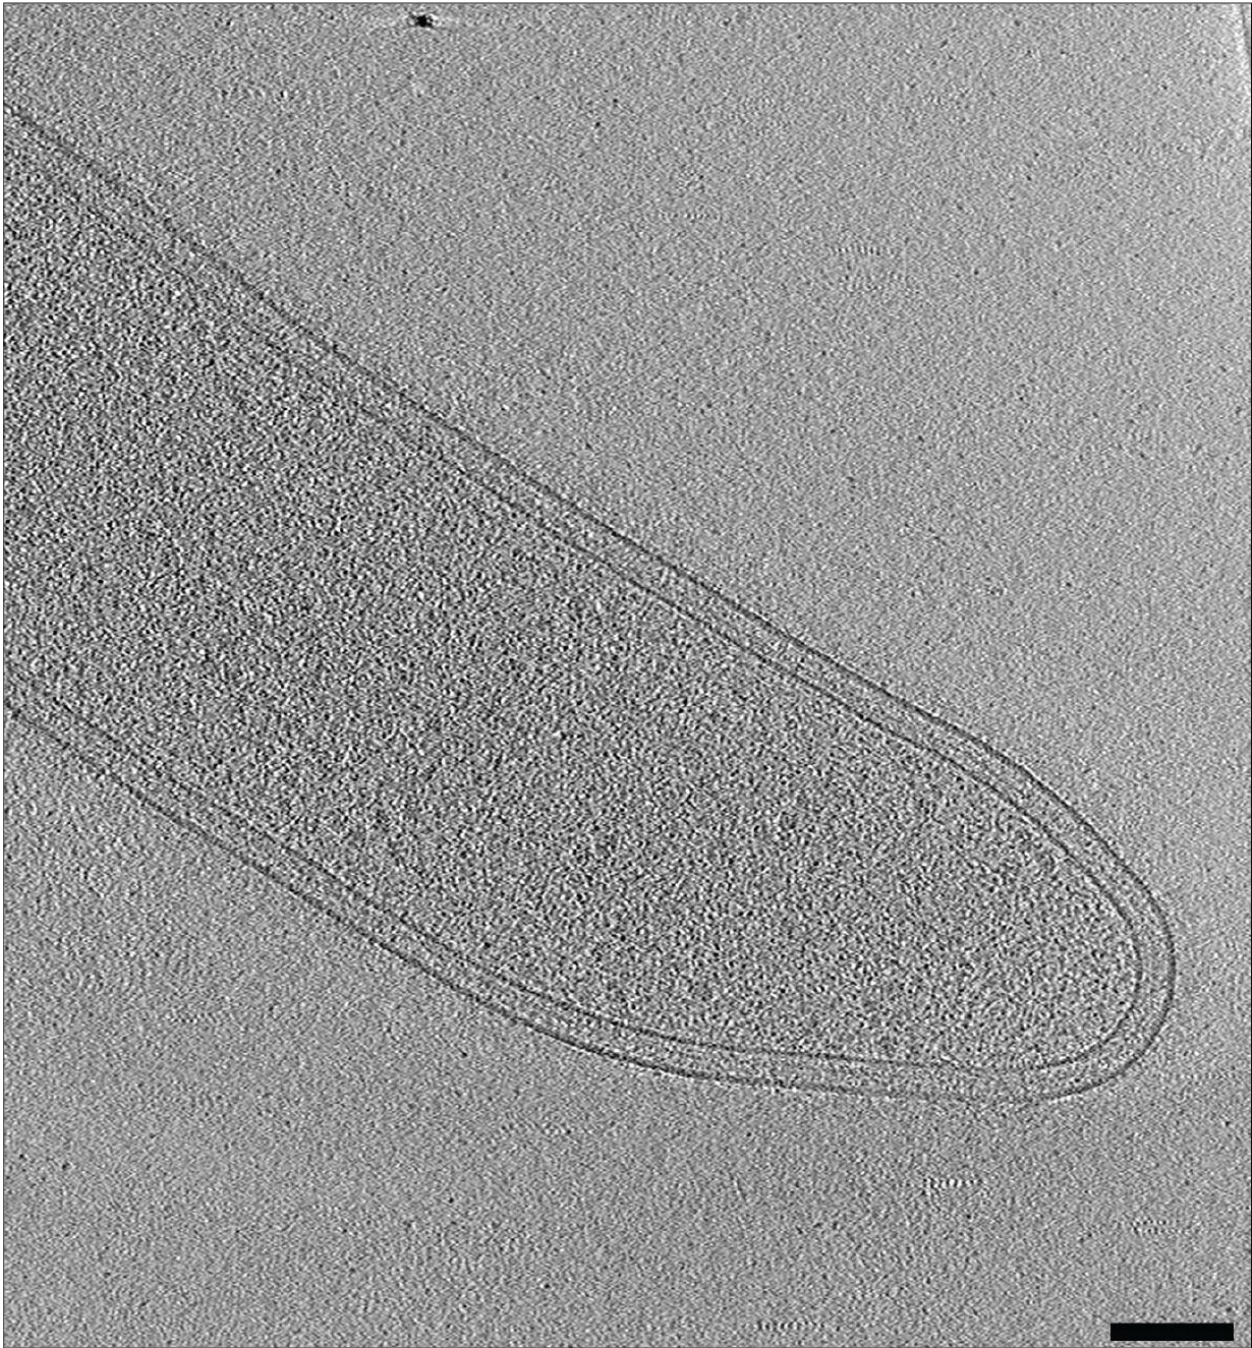

116

117

118

119



*Coxiella burnetii*

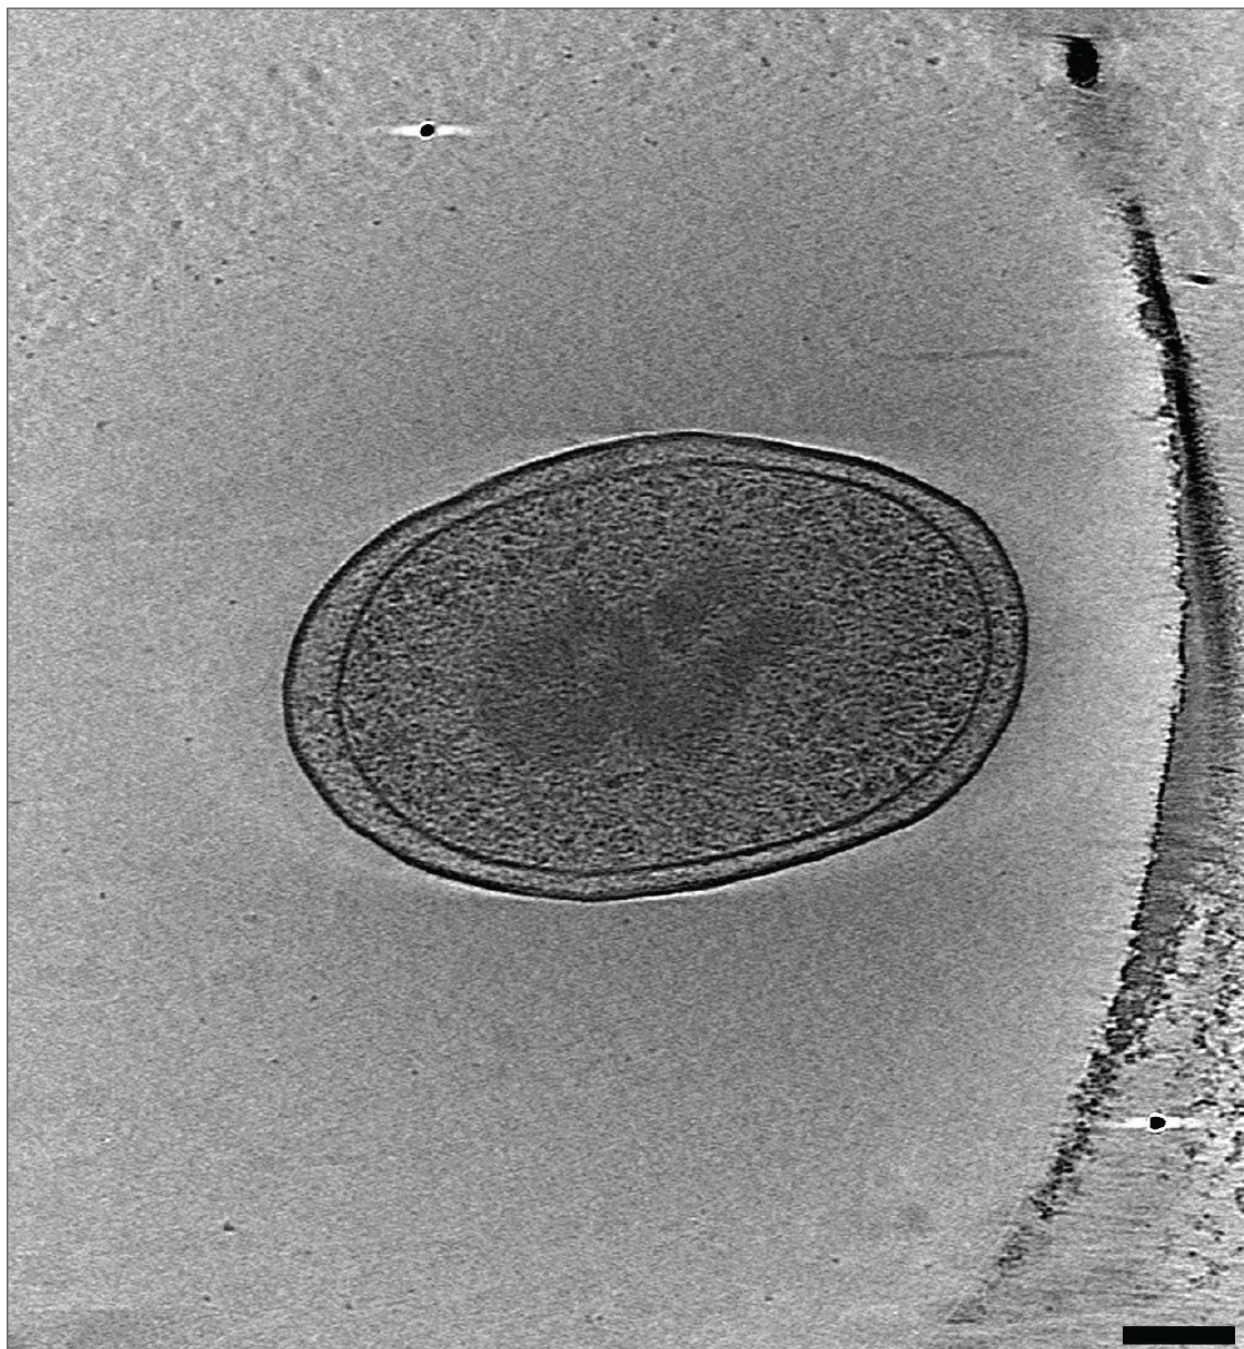

120

121

122

123

*Amoebophilus asiaticus*

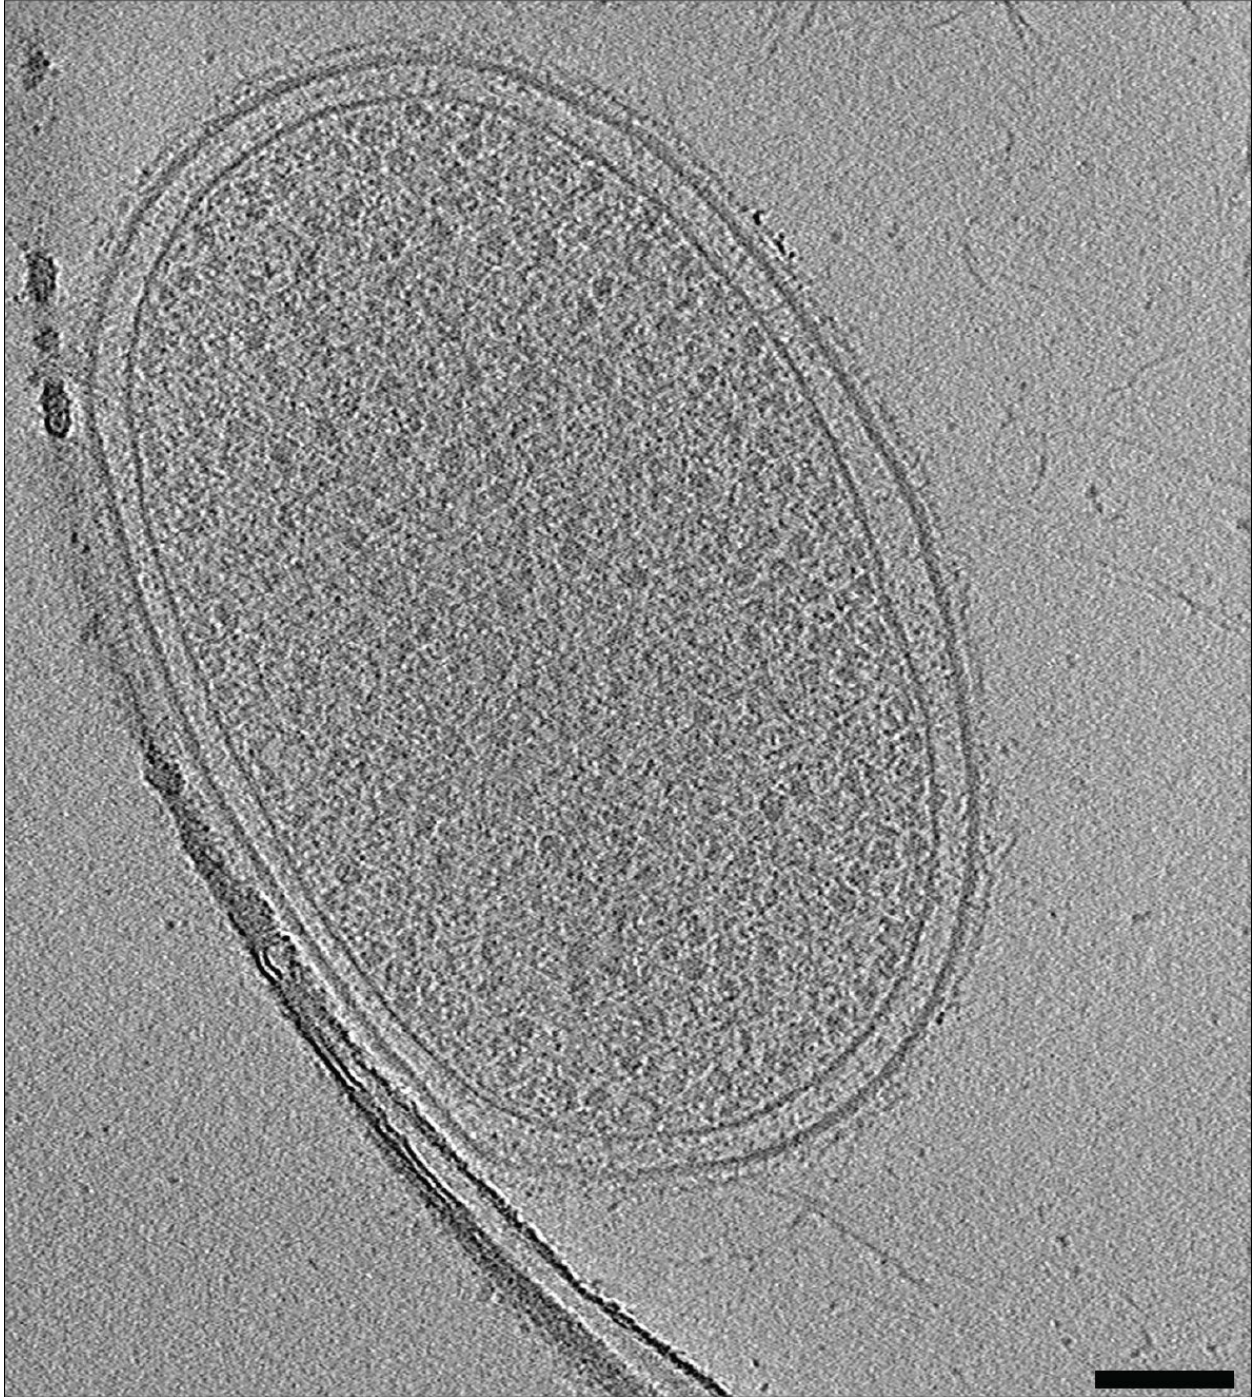

124

125 **Figure S3: Species where no hat-like structures were identified.** Slices through cryo-electron  
126 tomograms of species in which we found no hat-like structures. Note that the EPEC cell (strain

127 8612) is from a strain which has the NF-T3SScc but lacks the ft3SScc genes (see Materials and  
128 Methods). Scale bar is 100 nm.

129

130

131

132

133

134

135

136

137

138

139

140

141

142

143

144

145

146

147

148

149

150 **Movie S1:**

151 An electron cryo-tomogram of a partially lysed *E. coli* cell highlighting the presence of multiple  
152 hat-like complexes in the inner membrane (indicated by red circles).

153
